# Supplementary material
Source: PubMed Central journal article supplement (PMC10245338)
Supplement: NIHMS1901925-supplement-Supp1.pdf [file NIHMS1901925-supplement-Supp1.pdf]

Profile: Open Gargion

Gene Cart: Empty

  
   
   
 

Search results:

 Showing results for gene: **Tmprs3**

Annotation by organism

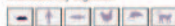

External resource links

[CCDS](#) [UCSC](#) [UniParc](#) [UniProt/SWISSPROT](#) [ENSEMBL](#) [PubMed](#)  
[HomoGene](#) [SHIELD](#) [DfG](#) [PhosphoSite](#)

Deatness gene annotation

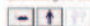

Functional annotation - transmembrane protease, serine 3

## scRNA-seq Dataset (Shrestha, et. al, 2018)

Log10 Gene Expression

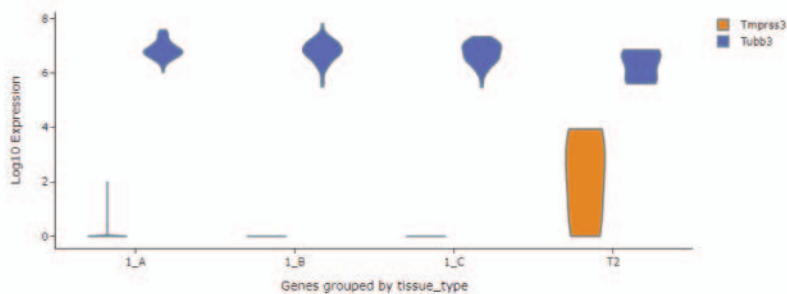

P25-P27

## scRNA-seq Dataset (Sun, et. al, 2018)

Log2 Gene Expression

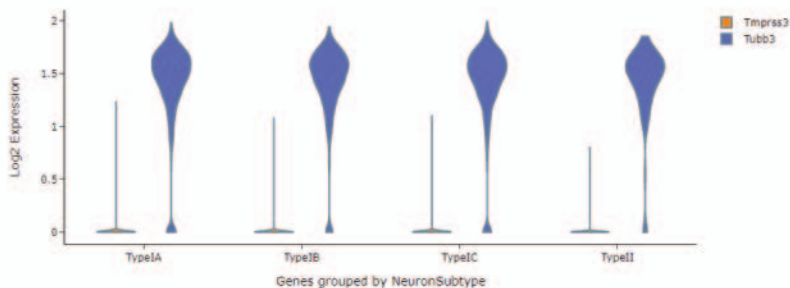

9 week

## scRNA-seq Dataset (Milon, et. al, 2021)

Log2 Gene Expression

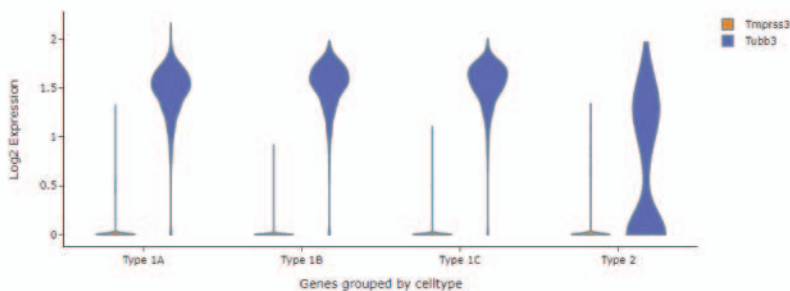

9 week

**HGVSc**

NM\_024022.4:c.1343T&gt;C

NM\_024022.4:c.1343T&gt;C

NM\_024022.4:c.1306C&gt;T

NM\_024022.4:c.1306C&gt;G

NM\_024022.4:c.1286A&gt;G

NM\_024022.4:c.1276G&gt;A

NM\_024022.4:c.1273T&gt;C

NM\_024022.4:c.1250G&gt;A

NM\_024022.4:c.1219T&gt;C

NM\_024022.4:c.1211C&gt;T

NM\_024022.4:c.1204G&gt;A

NM\_024022.4:c.1195-1G&gt;C

NM\_024022.4:c.1192C&gt;T

NM\_024022.4:c.1181\_1187delinsATCACTGATCACCCACTCTGCACTGATCT

NM\_024022.4:c.1159G&gt;A

NM\_024022.4:c.1129G&gt;A

NM\_024022.4:c.1048+1G&gt;A

NM\_024022.4:c.1039G&gt;T

NM\_024022.4:c.1025G&gt;A

NM\_024022.4:c.999del

NM\_024022.4:c.989del

NM\_024022.4:c.974T&gt;A

NM\_024022.4:c.953-5A&gt;G

NM\_024022.4:c.916G&gt;A

NM\_024022.4:c.913A&gt;T

NM\_024022.4:c.783-1G&gt;T

NM\_024022.4:c.783-1G&gt;A

NM\_024022.4:c.782+7\_782+8insT

NM\_024022.4:c.782+2T&gt;A

NM\_024022.4:c.771C&gt;G

NM\_024022.4:c.753G&gt;C

NM\_024022.4:c.743C&gt;T

NM\_024022.4:c.727G&gt;A

NM\_024022.4:c.718del

NM\_024022.4:c.677C&gt;A

NM\_024022.4:c.647G&gt;T

NM\_024022.4:c.647G&gt;A

NM\_024022.4:c.646C&gt;T

NM\_024022.4:c.616G&gt;T

**HGVSp**

-

NP\_076927.1:p.Met448Thr

NP\_076927.1:p.Arg436Cys

NP\_076927.1:p.Arg436Gly

NP\_076927.1:p.Asn429Ser

NP\_076927.1:p.Ala426Thr

NP\_076927.1:p.Cys425Arg

NP\_076927.1:p.Gly417Glu

NP\_076927.1:p.Cys407Arg

NP\_076927.1:p.Pro404Leu

NP\_076927.1:p.Gly402Arg

-

NP\_076927.1:p.Gln398Ter

NP\_076927.1:p.Val394AspfsTer3

NP\_076927.1:p.Ala387Thr

NP\_076927.1:p.Gly377Ser

-

NP\_076927.1:p.Glu347Ter

NP\_076927.1:p.Gly342Glu

NP\_076927.1:p.Asp334MetfsTer24

NP\_076927.1:p.Glu330GlyfsTer28

NP\_076927.1:p.Leu325Gln

-

NP\_076927.1:p.Ala306Thr

NP\_076927.1:p.Ile305Phe

-

-

-

-

NP\_076927.1:p.His257Gln

NP\_076927.1:p.Trp251Cys

NP\_076927.1:p.Thr248Met

NP\_076927.1:p.Gly243Arg

NP\_076927.1:p.His240ThrfsTer35

NP\_076927.1:p.Ser226Ter

NP\_076927.1:p.Arg216Leu

NP\_076927.1:p.Arg216His

NP\_076927.1:p.Arg216Cys

NP\_076927.1:p.Ala206Ser

NM\_024022.4:c.607C>T  
NM\_024022.4:c.595G>A  
NM\_024022.4:c.582T>A  
NM\_024022.4:c.581G>T

NM\_024022.4:c.579dup  
NM\_024022.4:c.554A>T

NM\_024022.4:c.551T>C  
NM\_024022.4:c.436G>A  
NM\_024022.4:c.432del

NM\_024022.4:c.413C>A  
NM\_024022.4:c.399G>C  
NM\_024022.4:c.326G>A

NM\_024022.4:c.325C>T

NM\_024022.4:c.323-6G>A  
NM\_024022.4:c.316C>T  
NM\_024022.4:c.310G>T  
NM\_024022.4:c.308A>G  
NM\_024022.4:c.271C>T

NM\_024022.4:c.208del  
NM\_024022.4:c.115C>T

NM\_024022.4:c.46C>T  
NM\_024022.4:c.36dup  
NM\_024022.4:c.36del

NP\_076927.1:p.Gln203Ter  
NP\_076927.1:p.Val199Met  
NP\_076927.1:p.Cys194Ter  
NP\_076927.1:p.Cys194Phe

NP\_076927.1:p.Cys194MetfsTer17  
NP\_076927.1:p.His185Leu

NP\_076927.1:p.Leu184Ser  
NP\_076927.1:p.Gly146Ser  
NP\_076927.1:p.Gln144HisfsTer8

NP\_076927.1:p.Ala138Glu  
NP\_076927.1:p.Trp133Cys  
NP\_076927.1:p.Arg109Gln

NP\_076927.1:p.Arg109Trp

-  
NP\_076927.1:p.Arg106Cys  
NP\_076927.1:p.Glu104Ter  
NP\_076927.1:p.Asp103Gly  
NP\_076927.1:p.Arg91Ter

NP\_076927.1:p.His70ThrfsTer19  
NP\_076927.1:p.Gln39Ter

NP\_076927.1:p.Arg16Ter  
NP\_076927.1:p.Phe13LeufsTer10  
NP\_076927.1:p.Phe13SerfsTer12

| <b>ACMG Codes</b>                                                | <b>Classification</b> | <b>PMID</b>                                                                                    |
|------------------------------------------------------------------|-----------------------|------------------------------------------------------------------------------------------------|
| PVS1_moderate, PM3, PP3, PM2                                     | Likely Pathogenic     | PMID: 30242206                                                                                 |
| PM3_VeryStrong, PP1, PP3, PM2                                    | Pathogenic            | PMID:24033266,28566687                                                                         |
| PM3_Strong, PP1_moderate, PP3, PM2_Supporting                    | Likely Pathogenic     | PMID:26969326,28566687,24033266                                                                |
| PM3, PM5, PP3, PM2                                               | Likely Pathogenic     | PMID:28566687                                                                                  |
| PM3, PP1, PP3, PM2                                               | Likely Pathogenic     | PMID:26969326                                                                                  |
| PM3_Strong, PP1_Strong, PS3_Supporting, PP3                      | Pathogenic            | PMID:21786053,11907649,20301607,25741868,12920079,24033266,28566687,28695016,29196752,30487145 |
| PM3_Supporting, PP1_Strong PP3, PM2                              | Likely Pathogenic     | PMID:21534946                                                                                  |
| PM3, PP1, PP3, PM2                                               | Likely Pathogenic     | PMID:28695016                                                                                  |
| PM3_supporting, PP1_Strong, PP3, PM2                             | Likely Pathogenic     | PMID:11424922,12920079                                                                         |
| PM3_Moderate, PP1_Strong, PP3, PS3_Supporting, PM2               | Pathogenic            | PMID:11462234,16021470,31850270,12920079                                                       |
| PM3, PP1, PP3, PM2                                               | Likely Pathogenic     | PMID:28695016                                                                                  |
| PVS1_Stong, PP1_moderate, PP3, PM2                               | Pathogenic            | PMID:21726435,25525159                                                                         |
| PVS1_Stong, PP1_moderate, PM2                                    | Pathogenic            | PMID:16021470,24033266,25525159                                                                |
| PVS1_Strong, PP1_moderate, PM2                                   | Pathogenic            | PMID:11137999                                                                                  |
| PM3, PP1, PP3, PM2                                               | Likely Pathogenic     | PMID:24130743,25770132                                                                         |
| PM3_supporting, PP1_moderate, PP3, PM2                           | Likely Pathogenic     | PMID:26226137                                                                                  |
| PVS1_Strong, PP1, PM2                                            | Pathogenic            | PMID:29889784                                                                                  |
| PVS1_Strong, PP1, PM2                                            | Pathogenic            | PMID:31045651                                                                                  |
| PM3_moderate, PP1_Moderate, PP3, PM2                             | Likely Pathogenic     | PMID:20301607,21117948,24033266,25525159                                                       |
| PVS1_Strong, PM3_supporting, PM2                                 | Likely Pathogenic     | PMID:28566687                                                                                  |
| PVS1_Strong, PP1_strong, PM2                                     | Pathogenic            | PMID:16460646                                                                                  |
| PM3, PP1, PP3, PM2                                               | Likely Pathogenic     | PMID:28566687                                                                                  |
| PVS1_Strong, PM3, PP3, PM2                                       | Pathogenic            | PMID:28566687                                                                                  |
| PM3_VeryStrong, PP1_Strong, PM2_Supporting, PP3, PS3_Supporting. | Pathogenic            | PMID:24033266,17551081,21786053,23958653,24526180,28695016,23208854,28246597,31045651          |
| PM3_supporting, PP1_moderate, PP3, PM2                           | Likely Pathogenic     | PMID:26226137                                                                                  |
| PVS1_Strong, PM3_supporting, PP1, PM2                            | Likely Pathogenic     | PMID:30303587                                                                                  |
| PVS1_Strong, PS1, PM2                                            | Likely Pathogenic     | PMID:29072634                                                                                  |
| PVS1_moderate, PM3_supporting, PP1, PP3, PM2                     | Likely Pathogenic     | PMID:15447792                                                                                  |
| PVS1_Strong, PM3_supporting, PP3, PM2                            | Likely Pathogenic     | PMID:28566687                                                                                  |
| PM3, PM1, PP3, PM2                                               | Likely Pathogenic     | PMID:25770132                                                                                  |
| PS1_Strong, PM2_Moderate, PM5_Moderate, PP3                      | Pathogenic            | PMID:11462234,12920079                                                                         |
| PM3_Supporting, PS3_supporting, PP3, PM2                         | Likely Pathogenic     | PMID:24526180                                                                                  |
| PM3_supporting, PP1_moderate, PP3, PM2                           | Likely Pathogenic     | PMID:24416283,20301607,24033266                                                                |
| PVS1_Strong, PP1, PM2                                            | Likely Pathogenic     | PMID:30622556                                                                                  |
| PVS1_Strong, PM3_supporting, PM2                                 | Likely Pathogenic     | PMID:24853665                                                                                  |
| PS3_supporting, PP3, PP1, PM2                                    | Likely Pathogenic     | PMID:16021470                                                                                  |
| PM5, PP3, PS3_Supporting, PM2                                    | Likely Pathogenic     | PMID:12920079,17551081,16021470,24033266,26445815                                              |
| PM5, PP3, PS3_Supporting, PM2                                    | Likely Pathogenic     | PMID:17551081                                                                                  |
| PM3_supporting, PP1_strong, PP3, PM2                             | Likely Pathogenic     | PMID:26226137                                                                                  |

|                                                     |                   |                                                                                                                                             |
|-----------------------------------------------------|-------------------|---------------------------------------------------------------------------------------------------------------------------------------------|
| PVS1_Strong, PM3_Supporting, PP1, PM2               | Pathogenic        | PMID:24130743,25770132                                                                                                                      |
| PM3_Strong, PP3, PM2                                | Likely Pathogenic | PMID:21786053                                                                                                                               |
| PVS1_Strong, PM3_supporting, PP1_moderate, PM2      | Pathogenic        | PMID:19888295,25525159                                                                                                                      |
| PM3_supporting, PP1_Moderate, PP3, PM2              | Likely Pathogenic | PMID:11424922,12920079                                                                                                                      |
| PVS1_Strong, PP1, PM2                               | Likely Pathogenic | PMID:24033266,26036852,26408194,2856687,30622556                                                                                            |
| PM3_Supporting, PM5, PP3, PM2                       | Likely Pathogenic | PMID:23967202                                                                                                                               |
| PS3_supporting, PM3_moderate, PP1, PP3, PM2         | Likely Pathogenic | PMID:31016883,31379920,32235586,32235586                                                                                                    |
| PM3_supporting, PP1_moderate, PP3, PM2              | Likely Pathogenic | PMID:26226137                                                                                                                               |
| PVS1_Strong, PM3_supporting, PP1, PM2               | Pathogenic        | PMID:31379920                                                                                                                               |
|                                                     |                   | PMID:16283880,22975204,25741868,21786053,24033266,25262649,28566687,29431110,31152317                                                       |
| PM3_Strong, PP1_moderate, PP3, PM2                  | Likely Pathogenic | PMID:26226137                                                                                                                               |
| PM3_supporting, PP1_moderate, PP3, PM2              | Likely Pathogenic | PMID:26226137                                                                                                                               |
| PM3_supporting, PP1, PM5, PP3, PM2                  | Likely Pathogenic | PMID:24853665                                                                                                                               |
|                                                     |                   | PMID:12393794,24033266,11424922,16524950,25741868,28566687,12920079                                                                         |
| PM3_VeryStrong, PP1, PS3_Supporting, PP3            | Pathogenic        | PMID:11137999,24033266,24416283,28695016,30622556                                                                                           |
| PVS1_Strong, PM3_Strong, PP1_Strong, PS3_Supporting | Pathogenic        | PMID:23967202,28246597                                                                                                                      |
| PM3, PP1, PP3, PM2                                  | Likely Pathogenic | PMID:21534946                                                                                                                               |
| PVS1_Strong, PM3_supporting, PP1_Strong, PM2        | Pathogenic        | PMID:11907649,12920079                                                                                                                      |
| PP1, PS3_Supporting, PP3, PM2                       | Likely Pathogenic | PMID:11907649,12920079                                                                                                                      |
| PVS1_Strong, PM3_supporting, PP1, PM2               | Pathogenic        | PMID:26226137                                                                                                                               |
|                                                     |                   | PMID:21534946,26036852,11907649,12920079,24033266,26408194,28263784,30311386,15447792,25741868,17981648,19170735,21786053,28566687,29293505 |
| PVS1_Strong, PM3_Verystrong, PP1_Strong             | Pathogenic        | PMID:26969326                                                                                                                               |
| PVS1_Strong, PM3_supporting, PM2                    | Likely Pathogenic | PMID:26969326                                                                                                                               |
|                                                     |                   | PMID:27344577,30245029,22133722                                                                                                             |
| PVS1_Strong, PM3, PP1, PM2                          | Pathogenic        | PMID:27344577,30245029,22133722                                                                                                             |
| PVS1_Strong, PM3_supporting, PP1, PM2               | Likely Pathogenic | PMID:23226338                                                                                                                               |
| PVS1_Strong, PM3_supporting, PM2                    | Likely Pathogenic | PMID:28246597                                                                                                                               |
